# Supplementary material for: Deep Learning Phenotyping of Tricuspid Regurgitation for Automated High Throughput Assessment of Transthoracic Echocardiography
Source: bioRxiv or medRxiv preprint supplement (doi:10.1101/2024.06.22.24309332), 2024-06-24
Supplement: Supplementary file [file media-1.pdf]

## Supplemental Figure 1

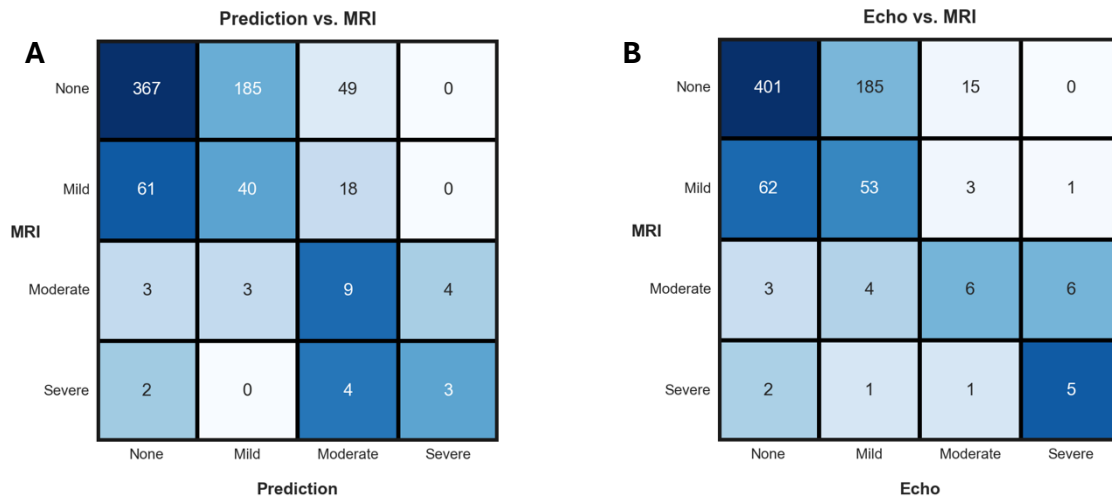

### MRI Cohort Characteristics

|                           |            |
|---------------------------|------------|
| <b>Number of Patients</b> | 572        |
| <b>Number of Studies</b>  | 748        |
| <b>TR Severity</b>        |            |
| None                      | 468 (62.6) |
| Mild                      | 243 (32.5) |
| Moderate                  | 25 (3.3)   |
| Severe                    | 12 (1.6)   |

### Echocardiogram Severity vs. MRI Severity

|                 |                       |
|-----------------|-----------------------|
| <b>Severity</b> | <b>AUC</b>            |
| Moderate/Severe | 0.820 (0.686 – 0.966) |
| Severe          | 0.841 (0.480 – 0.997) |

### Model Predicted Severity vs. MRI Severity

|                 |                       |
|-----------------|-----------------------|
| <b>Severity</b> | <b>AUC</b>            |
| Moderate/Severe | 0.896 (0.822 – 0.948) |
| Severe          | 0.949 (0.845 – 0.999) |

### DeLong Test Results

|                 |                |
|-----------------|----------------|
| <b>Severity</b> | <b>p-value</b> |
| Moderate/Severe | 0.11           |
| Severe          | 0.08           |
